# Supplementary material
Source: PubMed Central journal article supplement (PMC3061230)
Supplement: NIHMS272009-supplement-Supplemental_Figures.pdf [file NIHMS272009-supplement-Supplemental_Figures.pdf]

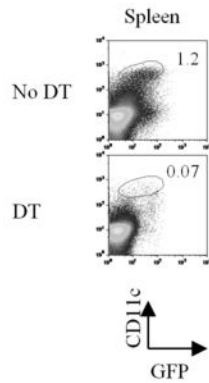

**Supplemental Figure 1. CD11c<sup>+</sup> DCs are depleted from the spleens of chimeric mice following administration of diphtheria toxin.** Bone marrow cells from CD11c-DTR/GFP mice were adoptively transferred into lethally irradiated TRP-SIY recipients. Eight weeks after reconstitution, chimeric mice were or were not injected i.p. with diphtheria toxin (DT). Two days later, CD11c<sup>+</sup>GFP<sup>+</sup> cells in the spleens were assayed by flow cytometry. Dot plots show CD11c versus GFP staining profiles of live cells. Numbers indicate percentage of CD11c<sup>+</sup>GFP<sup>+</sup> cells. Representative data from at least two similar experiments is shown.

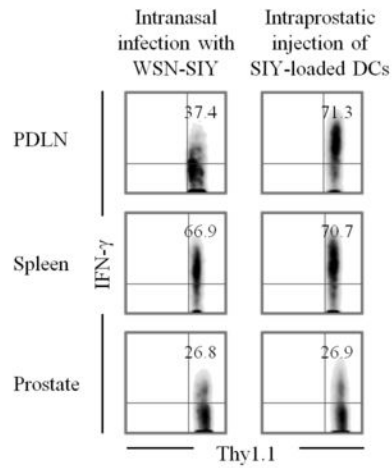

**Supplemental Figure 2. Intraprostatic injection of SIY-loaded DCs induces a robust T cell response in the tumor draining lymph nodes but not in the tumor tissue.** TRP-SIY mice were transferred with naïve 2C cells and either infected intranasally with WSN-SIY or injected intraprostatically with ex vivo matured, SIY-loaded DCs. Ten days later, cells from the PDLN, spleens and prostates were stained for 2C TCR, Thy1.1 and intracellular IFN- $\gamma$ . Density plots show IFN- $\gamma$  profiles of 2C TCR<sup>+</sup> Thy1.1<sup>+</sup> cells. Numbers indicate percentage of positive cells. Representative data from at least two similar experiments are shown, with 2-3 mice per group.
